# Supplementary material for: New insights into influences of initial oxidization states on dynamic reconstruction of Cu catalysts and C–C coupling in CO2 reduction
Source: Royal Society of Chemistry journal article supplement (doi:10.1039/d4cy00781f), 2024-01-01
Supplement: d4cy00781f1.pdf [file d4cy00781f1.pdf]

Supplementary Information

**New Insights into Influences of Initial Oxidization States on Dynamic Reconstruction of  
Cu Catalysts and C–C Coupling in CO<sub>2</sub> Reduction**

Chen Qin,<sup>1</sup> Xuheng Li,<sup>1</sup> Haoyang Li,<sup>1</sup> Ting Wang,<sup>1</sup> Xue Zhang,<sup>1</sup> Yuyao Wang,<sup>1</sup> Fuping Pan,<sup>1,2,\*</sup>

Kai-Jie Chen<sup>1,\*</sup>

<sup>1</sup> School of Chemistry and Chemical Engineering, Northwestern Polytechnical University,  
Xi'an, Shaanxi 710072, China

<sup>2</sup> Chongqing Innovation Center, Northwestern Polytechnical University, Chongqing, 401135,  
China

\* Corresponding authors emails: [fupingpan@nwpu.edu.cn](mailto:fupingpan@nwpu.edu.cn); [ckjiscon@nwpu.edu.cn](mailto:ckjiscon@nwpu.edu.cn)

## Chemicals

Copper (II) sulfate pentahydrate ( $\text{CuSO}_4 \cdot 5\text{H}_2\text{O}$ , AR), hydrazine hydrate aqueous solution ( $\text{N}_2\text{H}_4 \cdot \text{H}_2\text{O}$ , 85.0% of volume fraction), and potassium hydrogen carbonate ( $\text{KHCO}_3$ , AR) were purchased from Sinopharm Chemical Reagent Co., Ltd (Shanghai, China). Polyvinyl pyrrolidone (PVP, MW=55000, AR) and Nafion (5 wt%) were purchased from Macklin. Dimethyl sulfoxide and deuterium water were purchased from Rhawn. All chemicals were used as received without further purification.

## Catalysts Preparation

**Synthesis of  $\text{Cu}_2\text{O}$ .** 300 mg of PVP was added into 30 mL of 0.01 M  $\text{CuSO}_4$  aqueous solution under magnetic stirring (300 rpm). The mixture was kept stirring for several minutes until the powders were completely dissolved.  $\text{N}_2\text{H}_4 \cdot \text{H}_2\text{O}$  solution (10  $\mu\text{L}$ ) was then introduced into the mixture solution, forming the orange colloidal suspension of  $\text{Cu}_2\text{O}$  particles immediately. Thereafter, the resulting colloidal solution was further stirred (300 rpm) for 0.5 h for Ostwald ripening, resulting in the formation of the  $\text{Cu}_2\text{O}$  single-layer nanoshells. Finally, the nanoshells were centrifuged, washed with deionized water and ethanol, and dried overnight in a vacuum oven at 60 °C to yield  $\text{Cu}_2\text{O}$ .

**Synthesis of Cu and CuO.** The Cu catalyst was prepared by annealing as-prepared  $\text{Cu}_2\text{O}$  at 230 °C for 2 h under  $\text{H}_2/\text{Ar}$  (10 mol.%  $\text{H}_2$ ) atmosphere. The CuO catalyst was prepared by annealing as-prepared  $\text{Cu}_2\text{O}$  at 300 °C for 5 h in air.

All catalysts were stored in the Ar-filled glove box before use.

## Catalysts Characterization

The morphology, structure, and composition of catalysts were characterized by scanning electron microscopy (SEM, FEI Verios G4), transmission electron microscopy (TEM, FEI Talos F200X), high-angle annular dark-field scanning transmission electron microscopy (HAADF-STEM, FEI Themis Z), X-ray diffraction (XRD, MiniFlex), and X-ray photoelectron spectroscopy (XPS, Kratos AXIS Ultra DLD). *In-situ* Raman spectra were collected on a Horiba LabRAM HR Evolution spectroscopy at the excitation wavelength of 633 nm using a catalyst-coated gas diffusion layer as the working electrode. The contact angle was measured by a contact angle meter (Dong Guan Precise Test).

### **Electrochemical Measurements**

All electrochemical measurements were conducted on an electrochemical workstation (Gamry Interface 1000E). To prepare the cathode electrode, a mixture that contains 5 mg of catalysts, 2 mL of isopropanol, and 50  $\mu\text{L}$  of Nafion ionomer solution (5 wt% in isopropanol) was first sonicated for 60 min to obtain a catalyst ink. Then, 2 mL of the catalyst ink was sprayed onto a gas diffusion layer to achieve a catalyst loading of  $\sim 0.8 \text{ mg cm}^{-2}$ . Electrochemical tests were conducted in an electrochemical flow cell which includes a gas chamber, a cathodic chamber, and an anodic chamber. A 0.5 M  $\text{KHCO}_3$  solution was used as the anolyte and catholyte, and a proton exchange membrane (Nafion N115) was used to separate the anodic and cathodic chambers. A piece of nickel foam was used as the counter electrode, and a saturated Ag/AgCl was used as the reference electrode. The high-purity  $\text{CO}_2$  (99.999%, 24 sccm) was introduced on the back side of the gas diffusion layer, and the electrolyte flowed in both cathodic and anodic chambers with a flow rate of  $2 \text{ mL min}^{-1}$ . The EIS measurement was carried out in the 0.5 M  $\text{KHCO}_3$  solution with an amplitude of 5 mV of  $10^{-1}$  to  $10^6$  Hz. The electrochemical active surface areas (ECSAs) were determined by measuring double-layer capacitance ( $C_{dl}$ ).  $C_{dl}$  was determined by measuring the capacitive current associated with double-layer charging

from the scan-rate dependence of cyclic voltammogram (CV). All potentials were converted to the reversible hydrogen electrode by  $E(\text{RHE}) = E(\text{Ag/AgCl}) + 0.197 \text{ V} + 0.0591 \text{ V} \times \text{pH}$  without  $iR$  compensation.

### Product Analysis

The gaseous products were monitored by an online gas chromatograph (GC, GC9790PLUS) equipped with a thermal conductivity detector (TCD) and a flame ionization detector (FID). The liquid products in cathode chambers were collected after electrolysis and analyzed by  $^1\text{H}$  nuclear magnetic resonance (NMR, Bruker AV400) using DMSO as the internal standard and  $\text{D}_2\text{O}$  as a proton signal source.

The Faraday efficiency (FE) of gas products was calculated by the following equation:

$$FE\% = \frac{I}{I_{total}} = \frac{zFnV}{I_{total}} \times 100$$

Where  $I$  is the partial current density of a specific product.

$I_{total}$  is the total current density collected in the bulk electrolysis at an applied potential.

$z$  is the number of electrons involved in the formation of a specific product.  $F$  is the Faraday constant,  $96485 \text{ C mol}^{-1}$ .  $n$  is the mole fraction of the product.  $V$  is the gas volumetric flow rate of gas.

The FE of the liquid products was calculated as:

$$FE = z \cdot F \cdot \frac{n}{Q}$$

Where  $z$  is the number of electrons transferred per mole of gas product,  $F$  is Faraday constant ( $96500 \text{ C mol}^{-1}$ ),  $n$  is the total amount of the liquid products determined from NMR (mole),  $Q$  is the total amount of charge passed through the cathode ( $\text{A}\cdot\text{s}$ ).

(a)

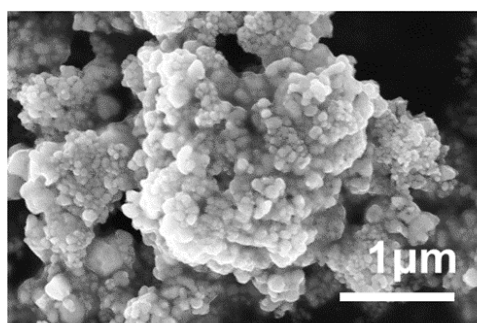

(b)

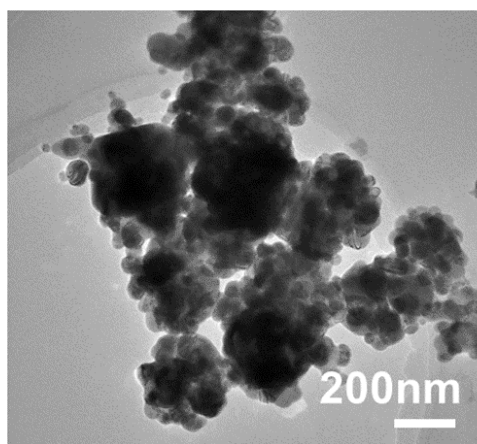

**Figure S1.** (a) SEM and (b) TEM images of the fresh Cu catalyst.

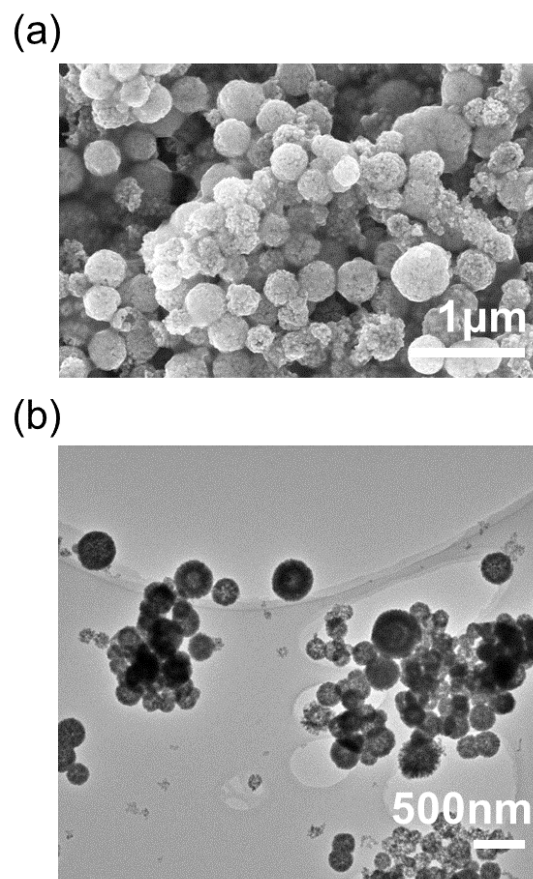

**Figure S2.** (a) SEM and (b) TEM images of the fresh  $\text{Cu}_2\text{O}$  catalyst.

(a)

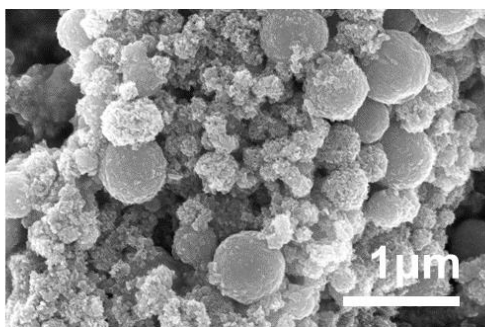

(b)

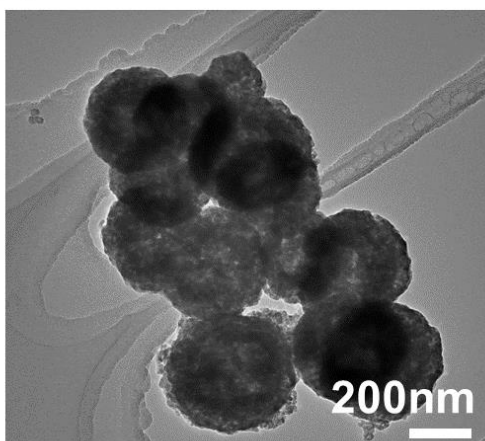

**Figure S3.** (a) SEM and (b) TEM images of the fresh CuO catalyst.

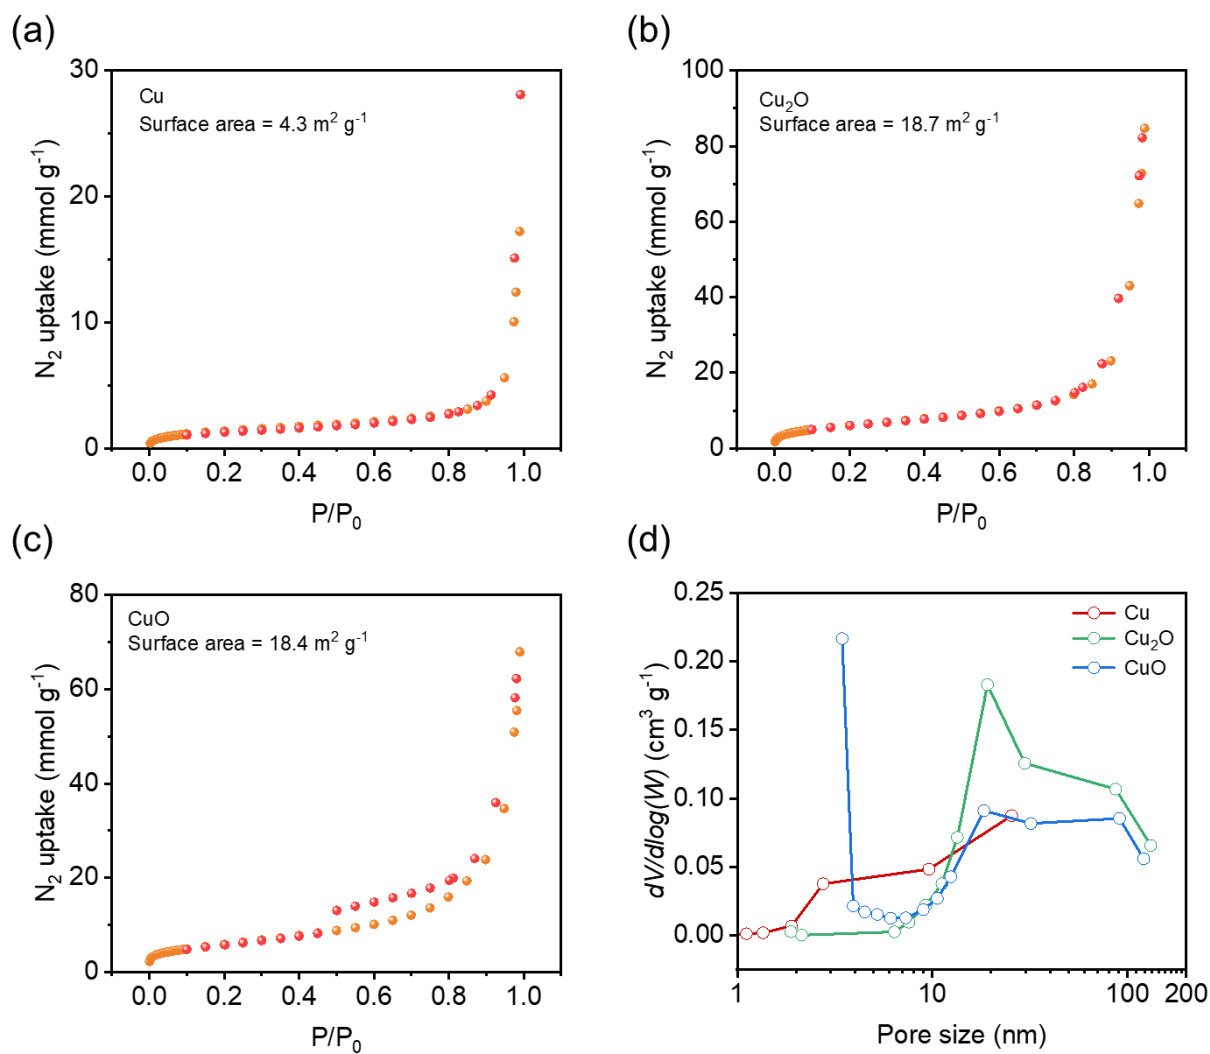

**Figure S4.** 77 K N<sub>2</sub> adsorption-desorption isotherms of Cu (a), Cu<sub>2</sub>O (b), CuO (c). (d) Pore size distribution of Cu, Cu<sub>2</sub>O, CuO.



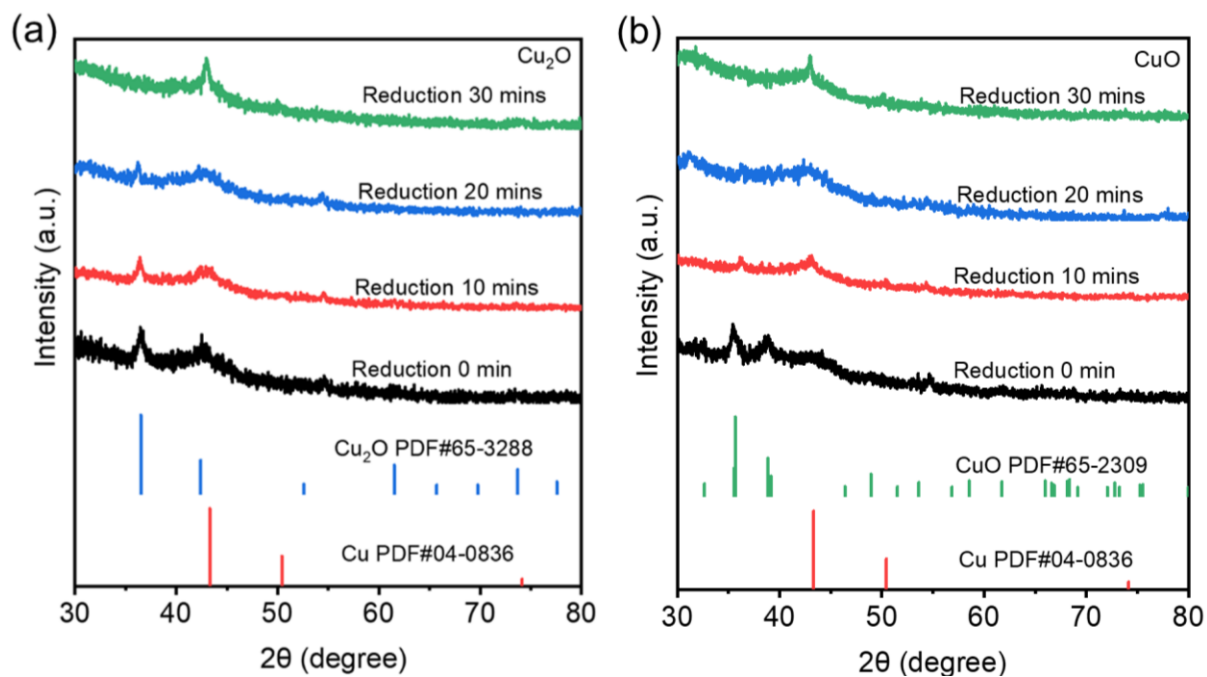

**Figure S5.** Time-dependent XRD patterns of  $\text{Cu}_2\text{O}$  and  $\text{CuO}$  reduced at  $-1.4$  V vs. RHE.

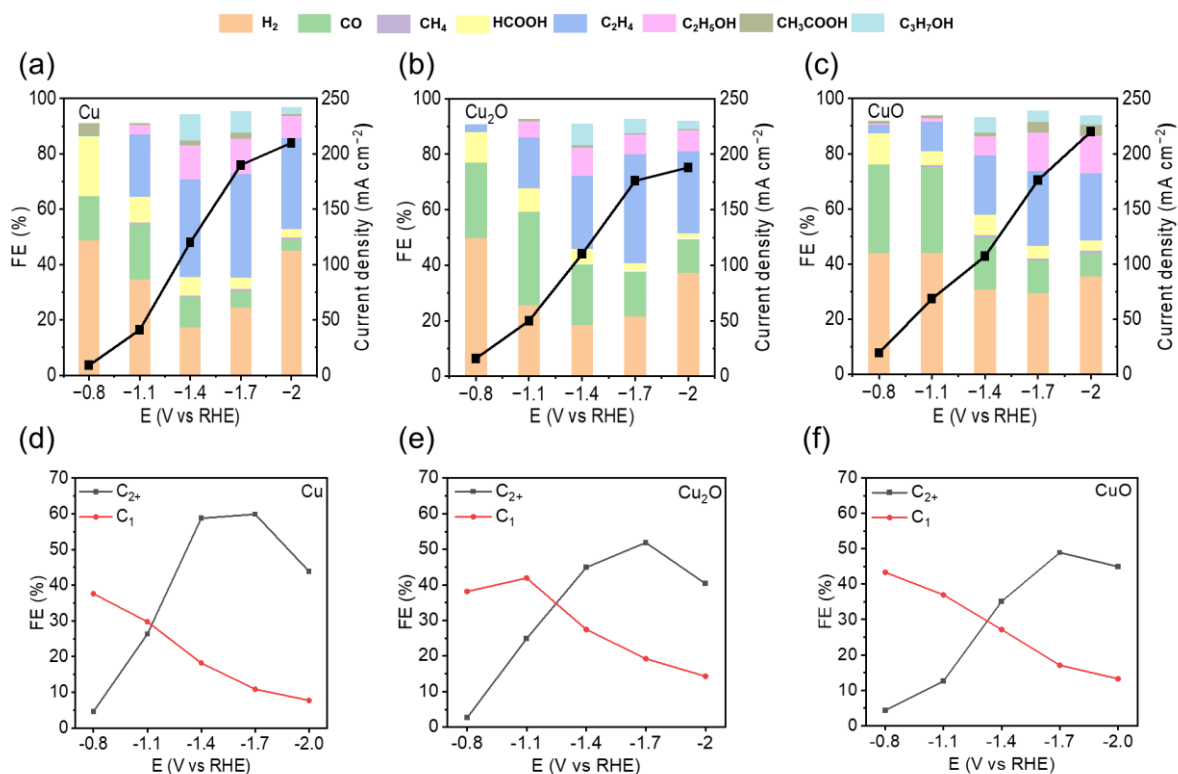

**Figure S6.** (a-c) FEs and current densities of CO<sub>2</sub>RR products on the Cu, Cu<sub>2</sub>O, and CuO catalysts. (d-f) FEs of C<sub>2</sub><sup>+</sup> and C<sub>1</sub> products on the Cu, Cu<sub>2</sub>O, and CuO catalysts.

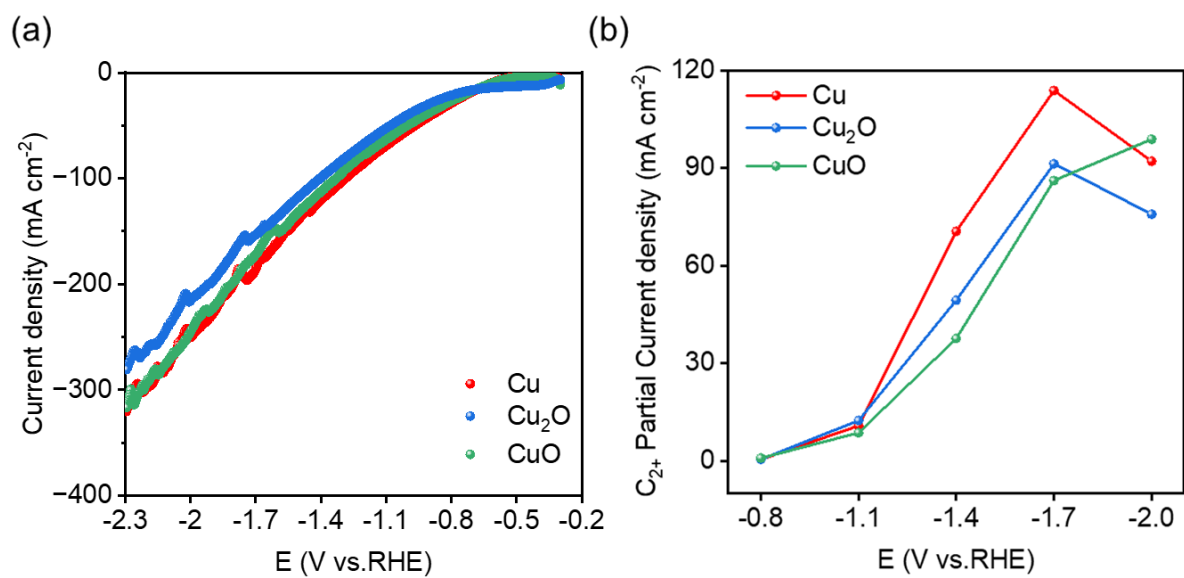

**Figure S7.** (a) Linear sweep voltammetry (LSV) curves and (b) C<sub>2+</sub> partial current density of for various catalysts.

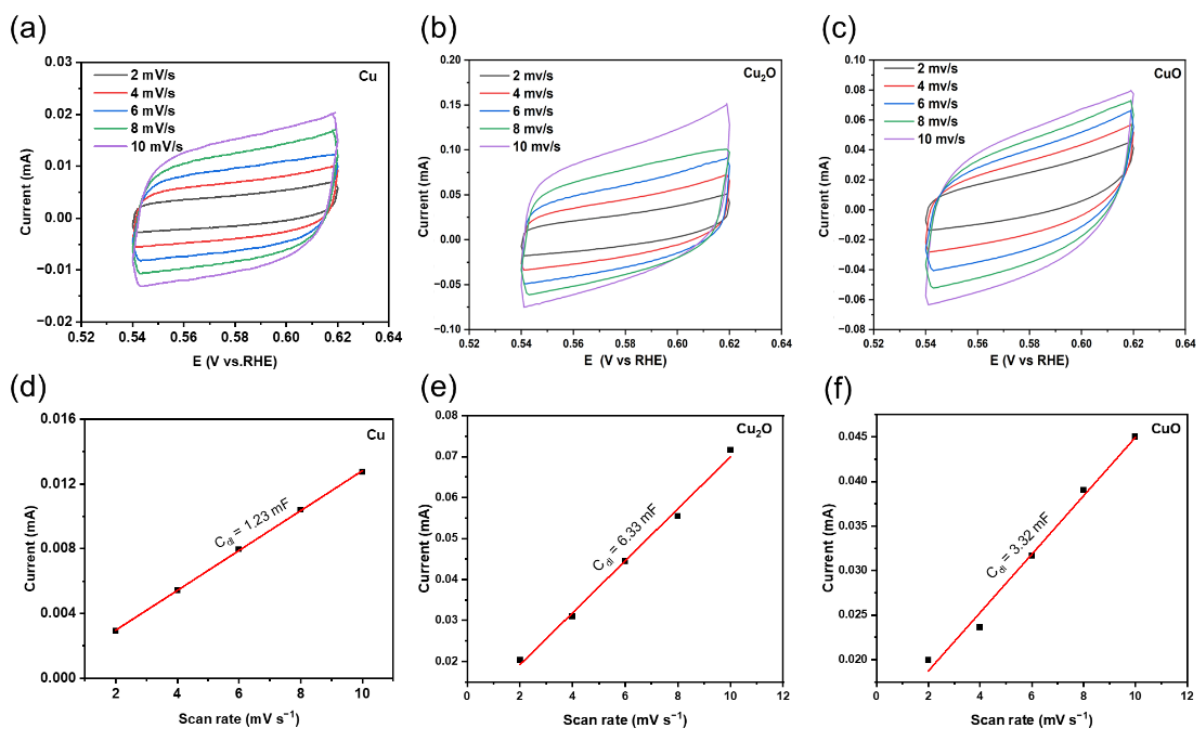

**Figure S8.** (a-c) Cyclic voltammogram curves of Cu (a), Cu<sub>2</sub>O (b), and CuO (c) at various scan rates (2, 4, 6, 8, and 10 mV s<sup>-1</sup>). (d-f) Capacitive currents against scan rates at 0.60 V to obtain the double-layer capacities ( $C_{dl}$ , mF cm<sup>-2</sup><sub>(electrode)</sub>) based on the slopes of these plots for Cu (d), Cu<sub>2</sub>O (e), and CuO (f).

Electrochemically active surface area (ECSA, cm<sup>2</sup>) was estimated as:

$$ECSA = \frac{C_{dl}}{C_{gc}}$$

where  $C_{gc}$  is the double layer capacitance (mF cm<sup>-2</sup>) of the glassy carbon electrode surface, for which the typical value of 0.029 mF cm<sup>-2</sup> was used.

(a)

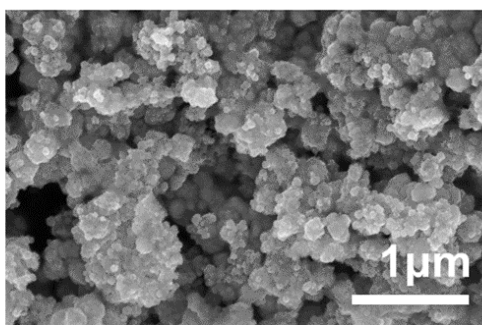

(b)

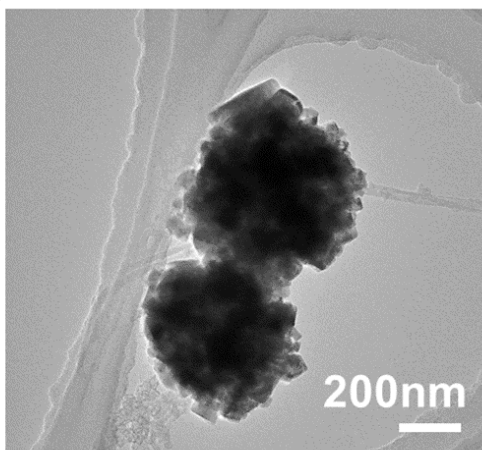

**Figure S9.** (a) SEM and (b) TEM images of the Cu catalyst after CO<sub>2</sub> reduction.

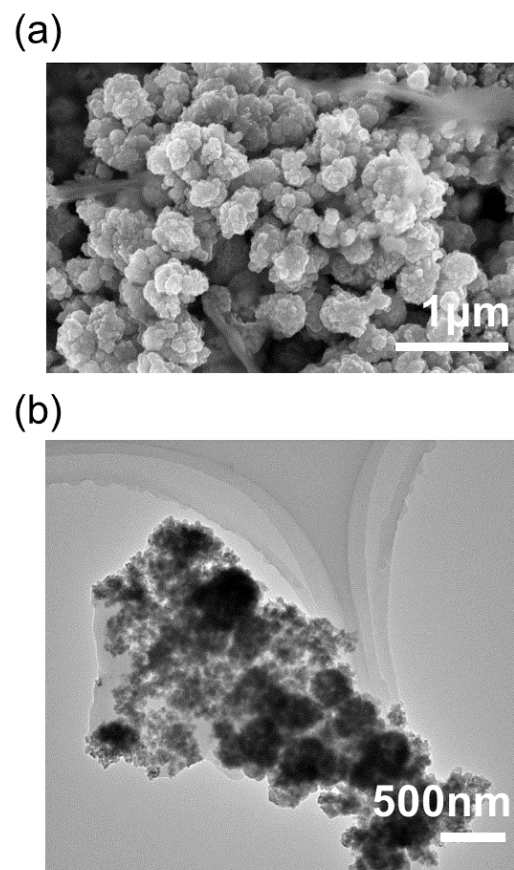

**Figure S10.** (a) SEM and (b) TEM images of the  $\text{Cu}_2\text{O}$  catalyst after  $\text{CO}_2$  reduction.

(a)

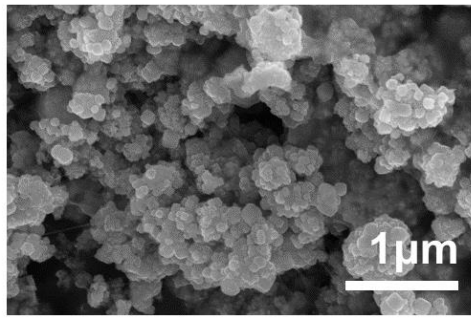

(b)

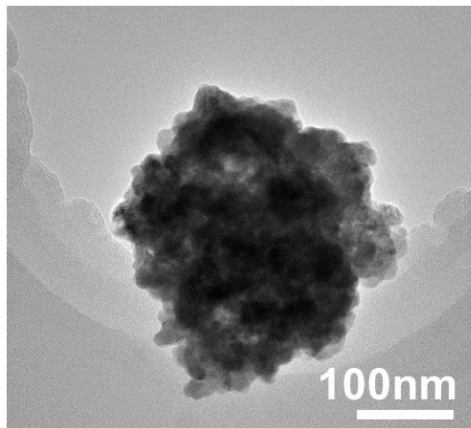

**Figure S11.** (a) SEM and (b) TEM images of the CuO catalyst after CO<sub>2</sub> reduction.

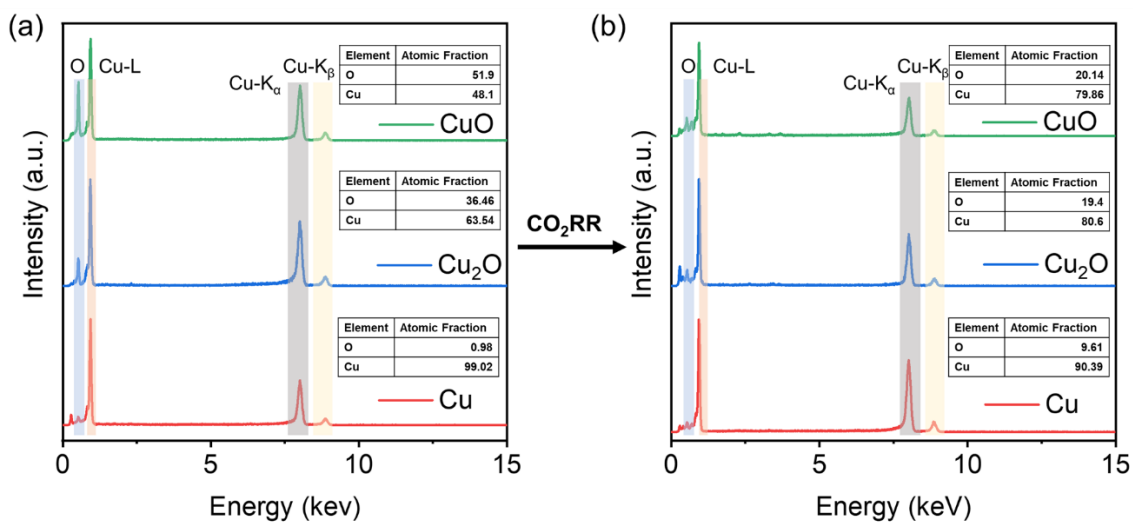

**Figure S12.** (a, b) EDS spectra for catalysts before (a) and after CO<sub>2</sub>RR (b).



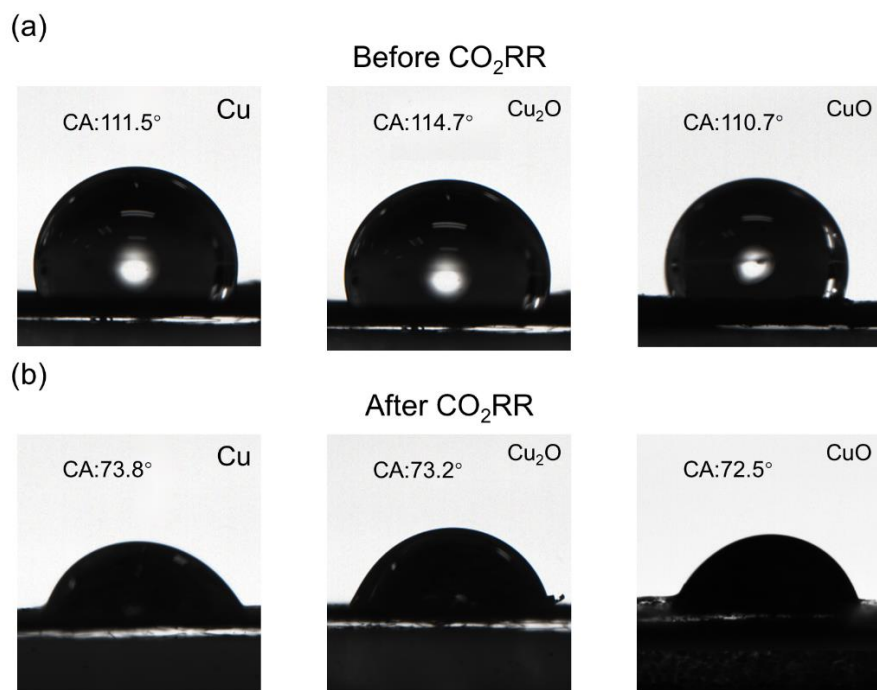

**Figure S13.** Contact angles of 0.5 M KHCO<sub>3</sub> on GDL-loaded Cu, Cu<sub>2</sub>O, and CuO catalysts before (a) and after CO<sub>2</sub>RR (b).
